# Supplementary material for: Antimicrobial resistance patterns of Streptococcus uberis isolates from bovine milk in Chiba prefecture, Japan: association between multidrug resistance and clonal complex 996
Source: PubMed Central journal article supplement — J Vet Med Sci. 2024 Apr 2;86(5):468–73. doi: 10.1292/jvms.23-0526 (PMC11144525; doi:10.1292/jvms.23-0526), 2024-04-02
Supplement: jvms-86-468-s001.pdf [file jvms-86-468-s001.pdf]

Supplementary Fig. 1

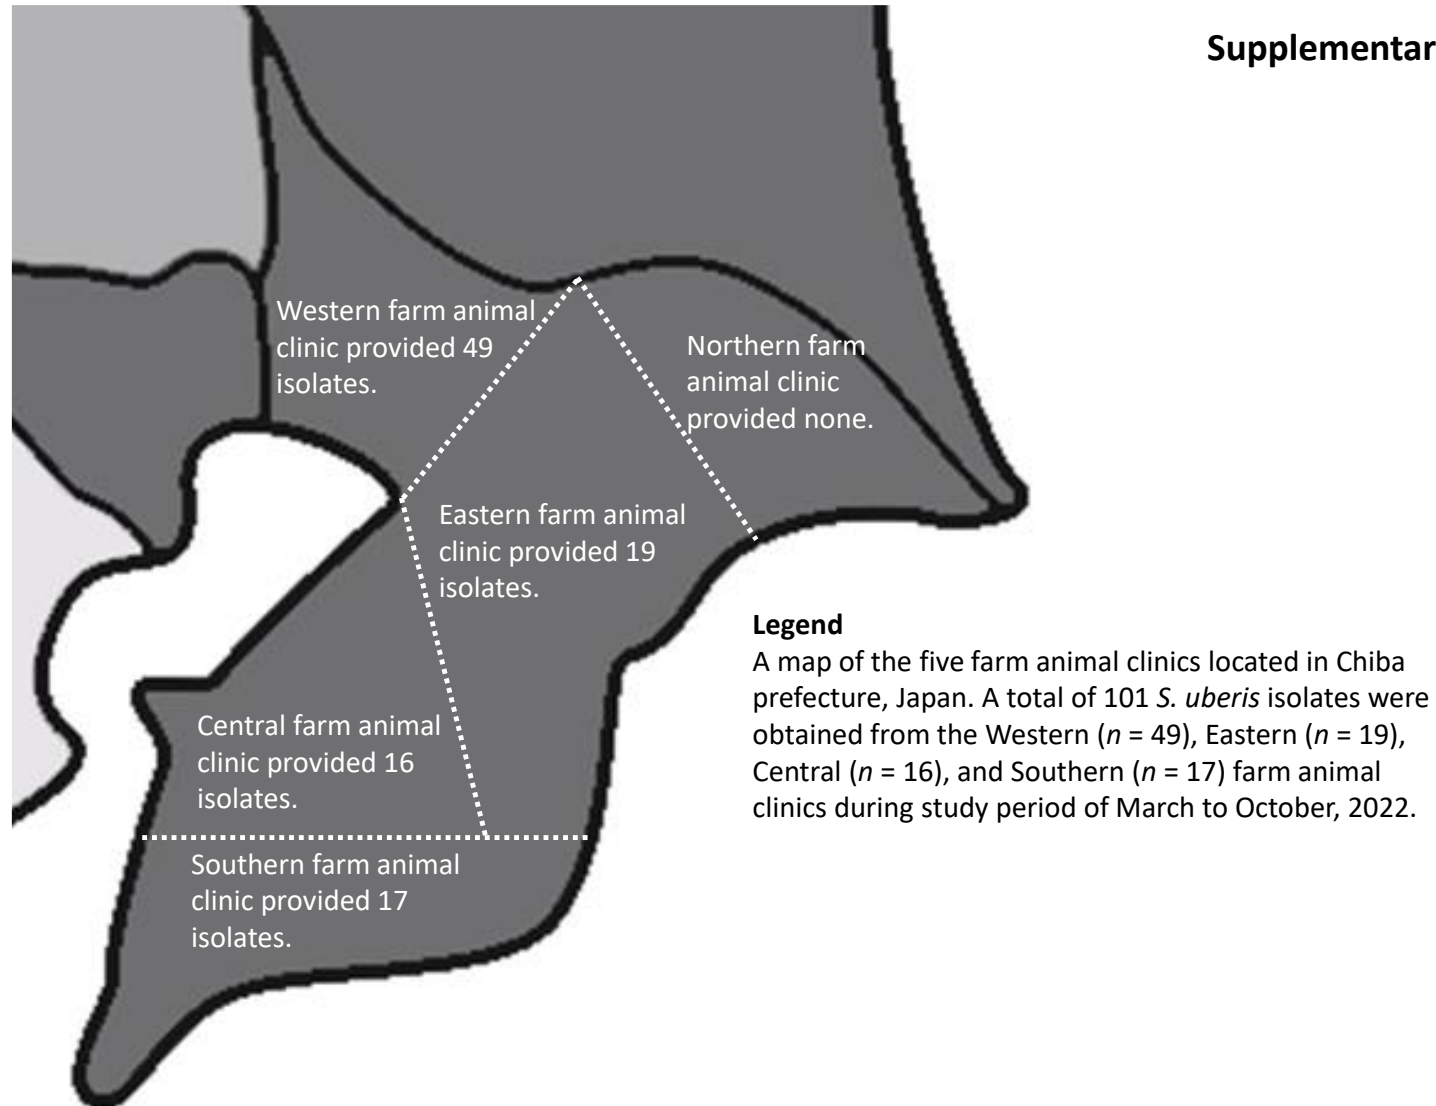

# Penicillin G MIC distribution

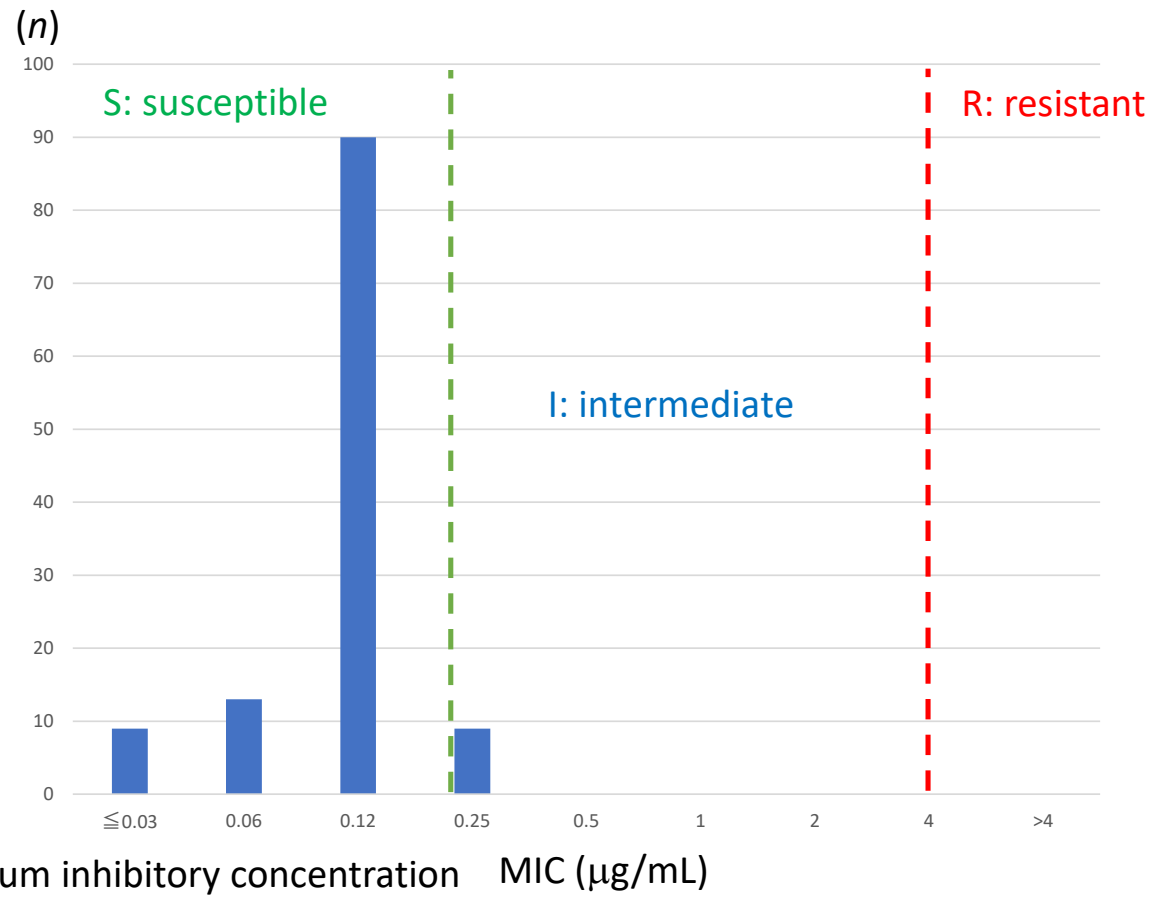

# Ampicillin MIC distribution

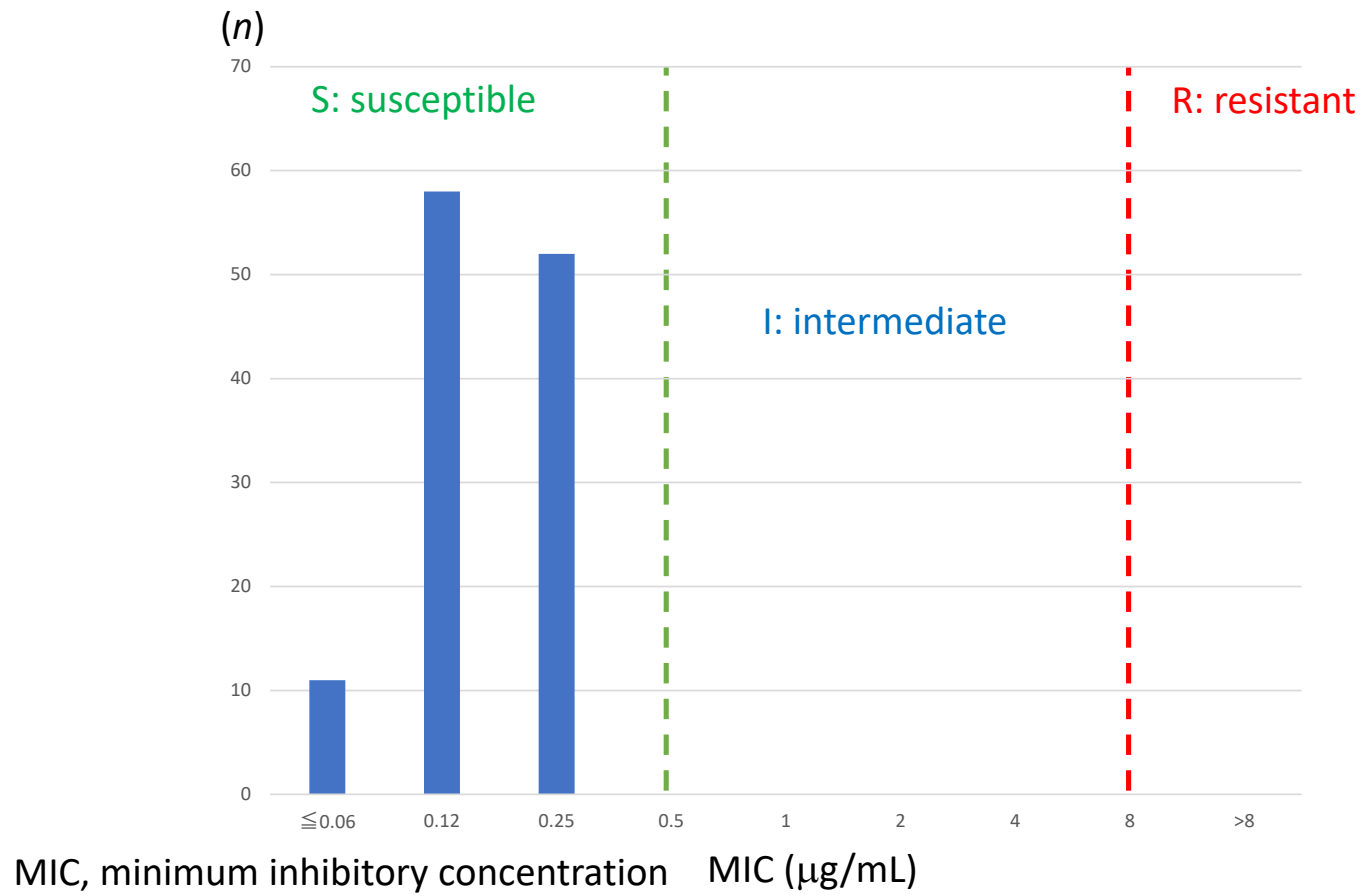

# Minocycline MIC distribution

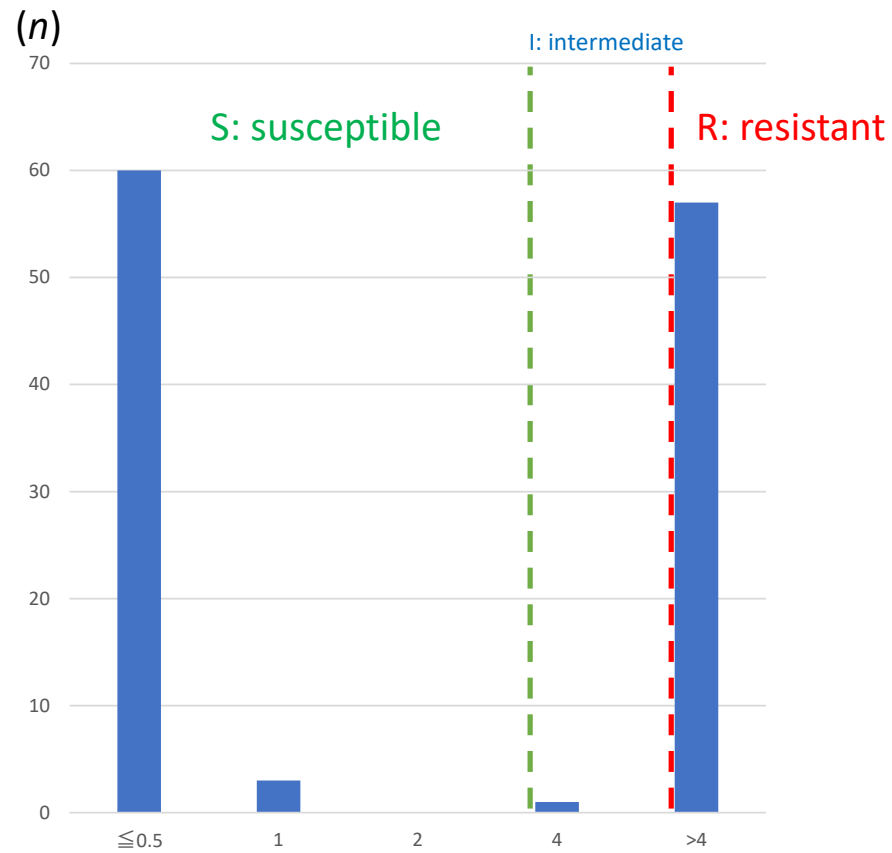

MIC, minimum inhibitory concentration MIC (µg/mL)

# Erythromycin MIC distribution

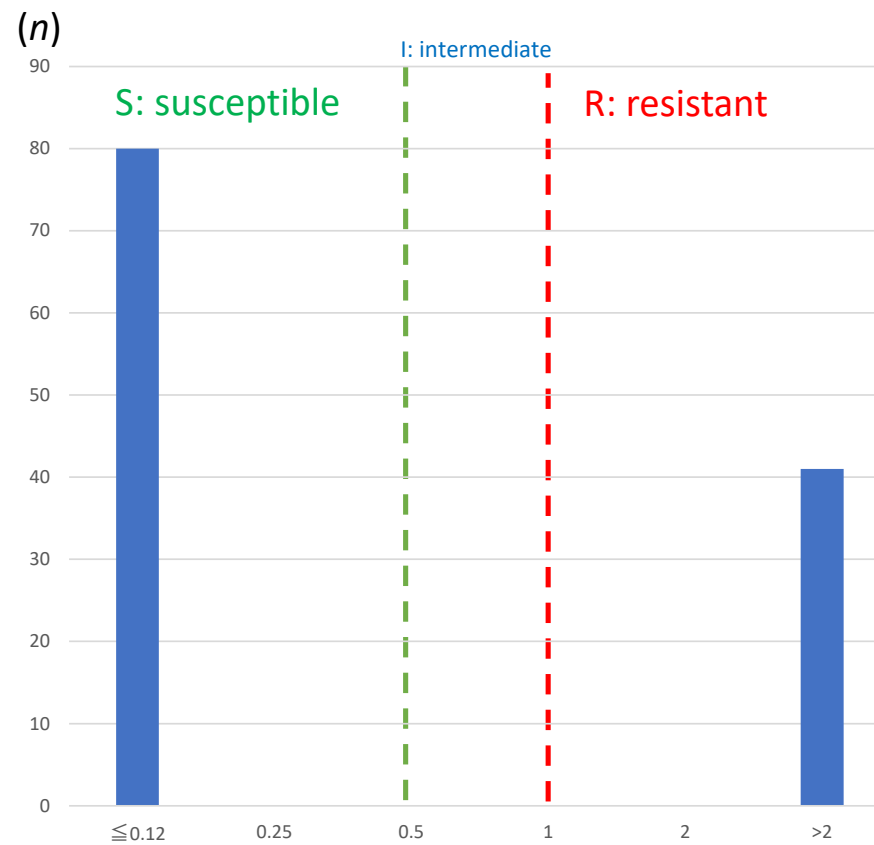

MIC, minimum inhibitory concentration MIC (µg/mL)

# Chloramphenicol MIC distribution

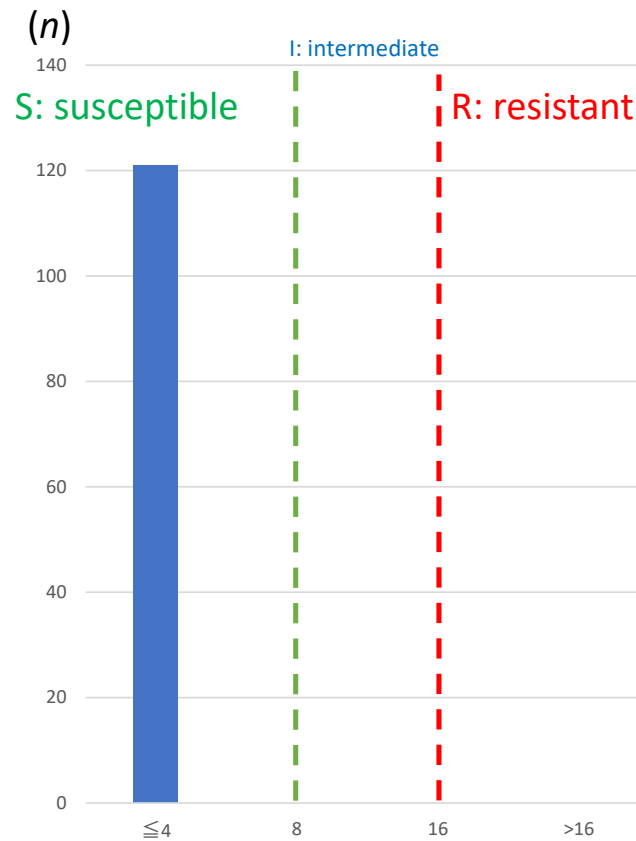

MIC, minimum inhibitory concentration MIC ( $\mu\text{g/mL}$ )

# Cefotaxime MIC distribution

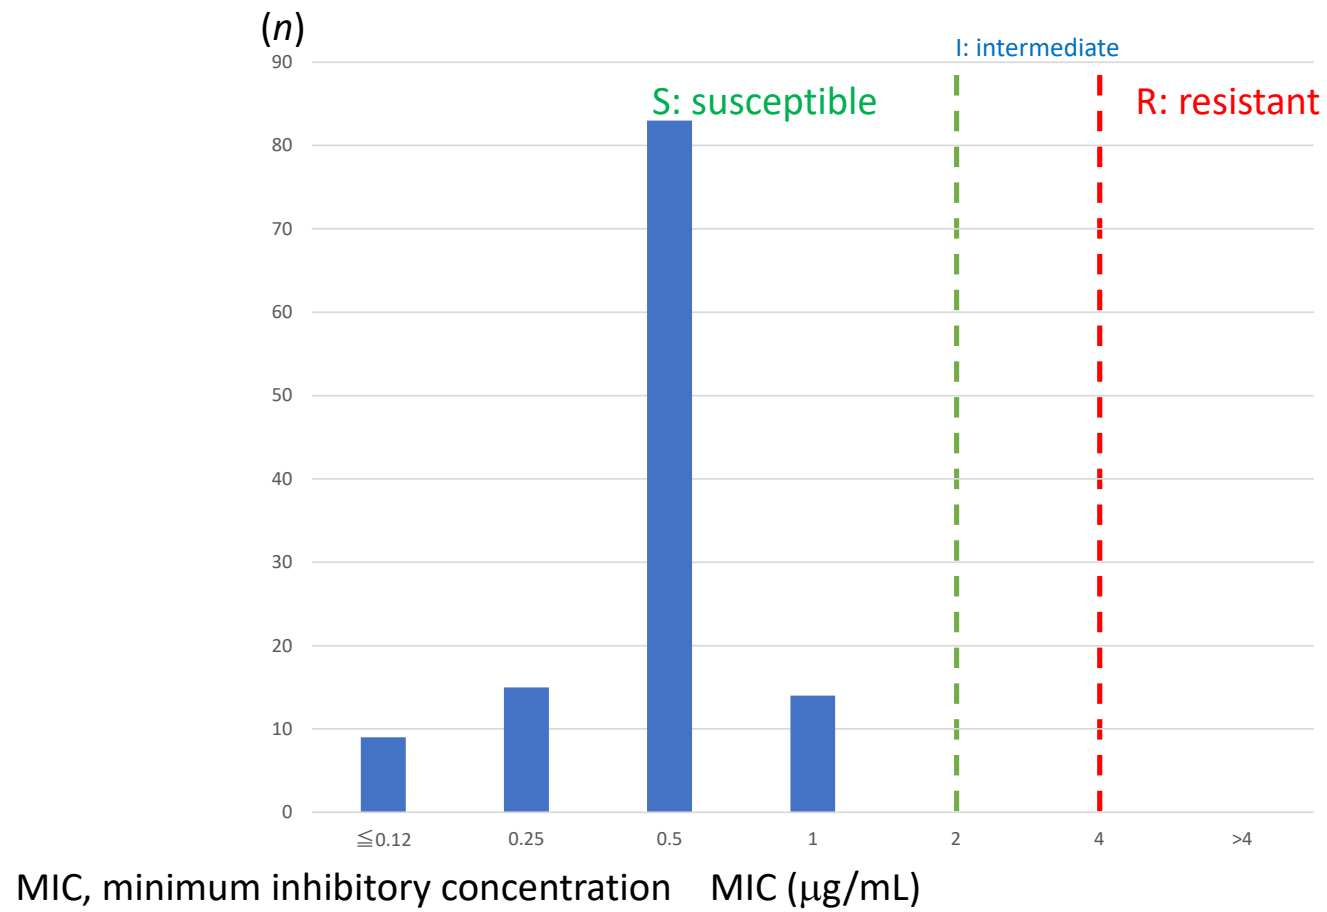

# Cefozopran MIC distribution

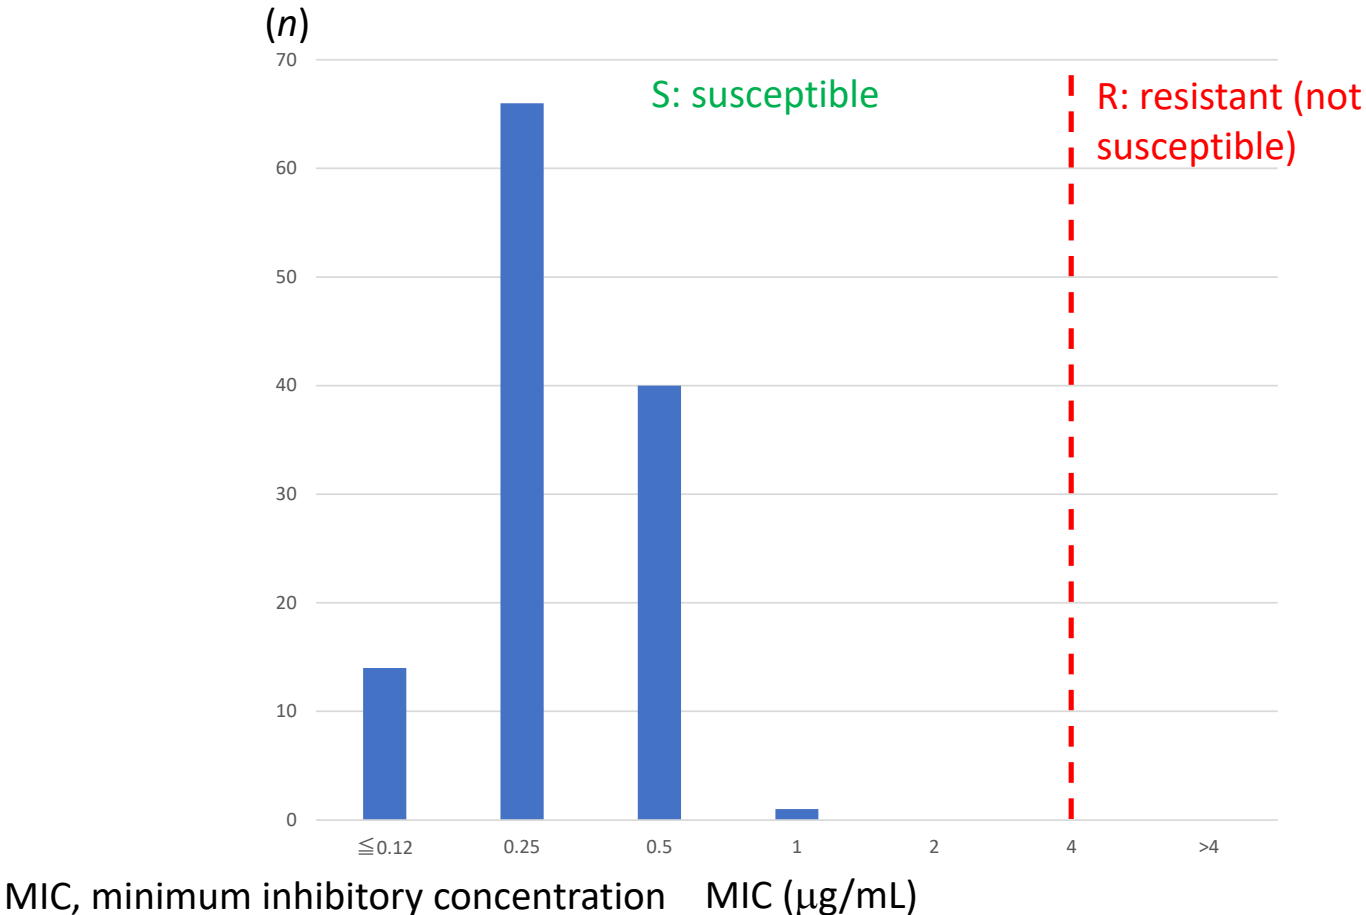



# Cefepime MIC distribution

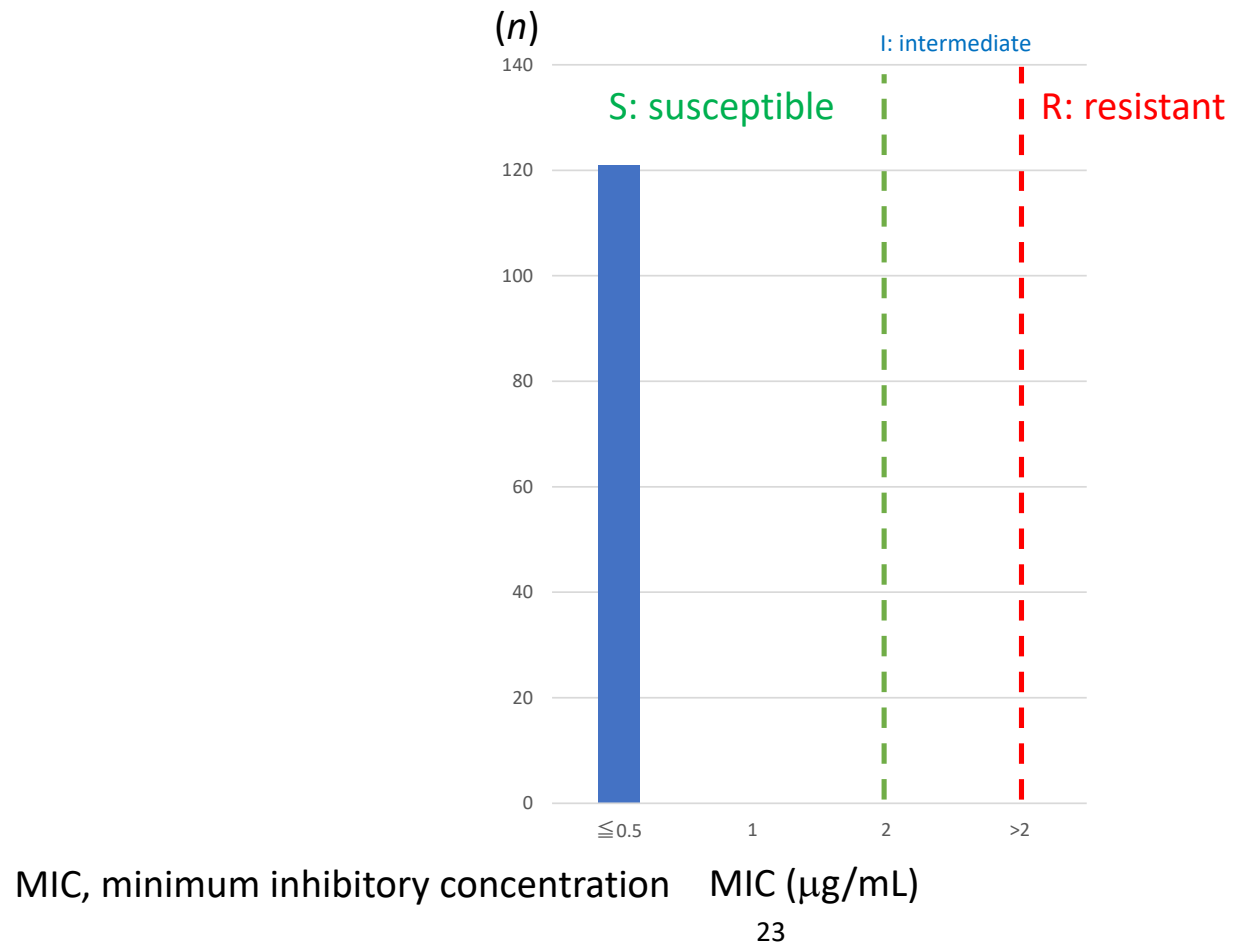

# Clindamycin MIC distribution

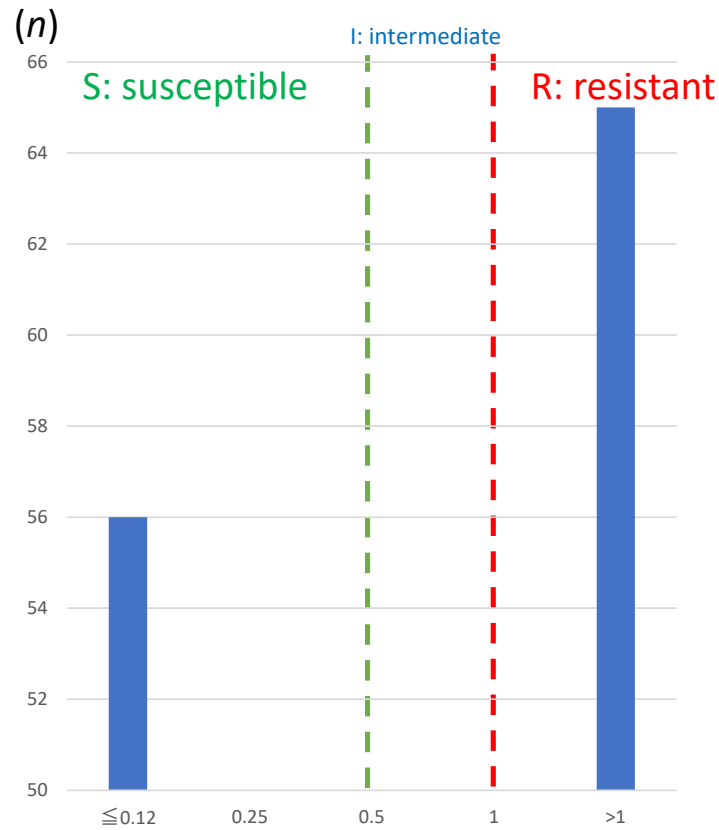

MIC, minimum inhibitory concentration MIC (µg/mL)

# Levofloxacin MIC distribution

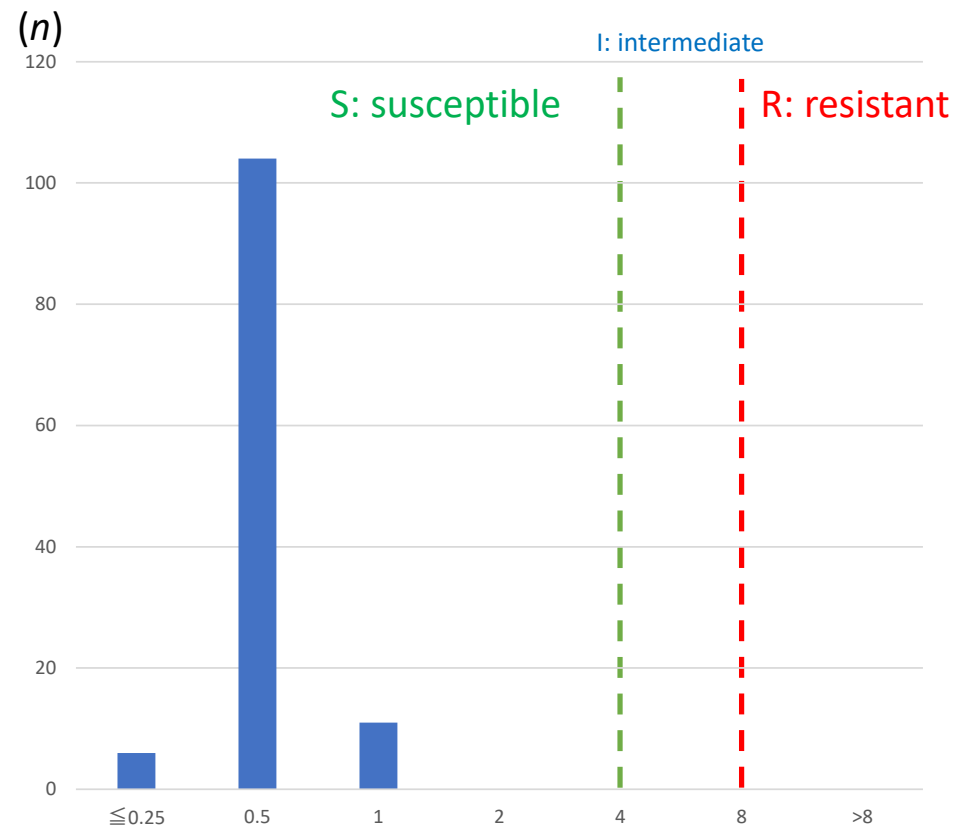

MIC, minimum inhibitory concentration MIC (µg/mL)

# Meropenem MIC distribution

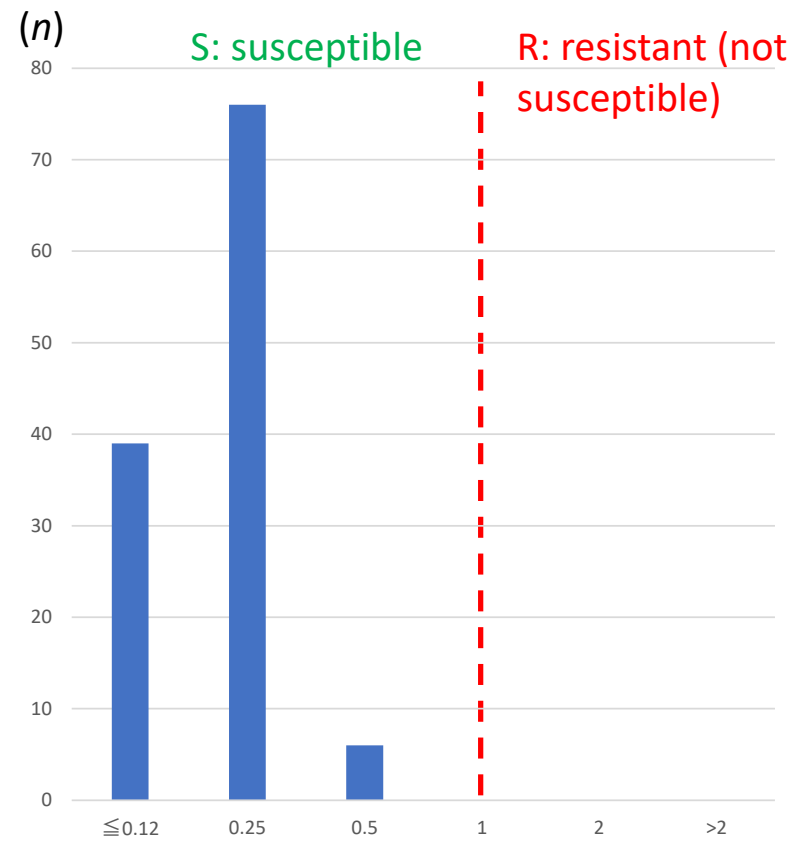

MIC, minimum inhibitory concentration MIC (µg/mL)

# Vancomycin MIC distribution

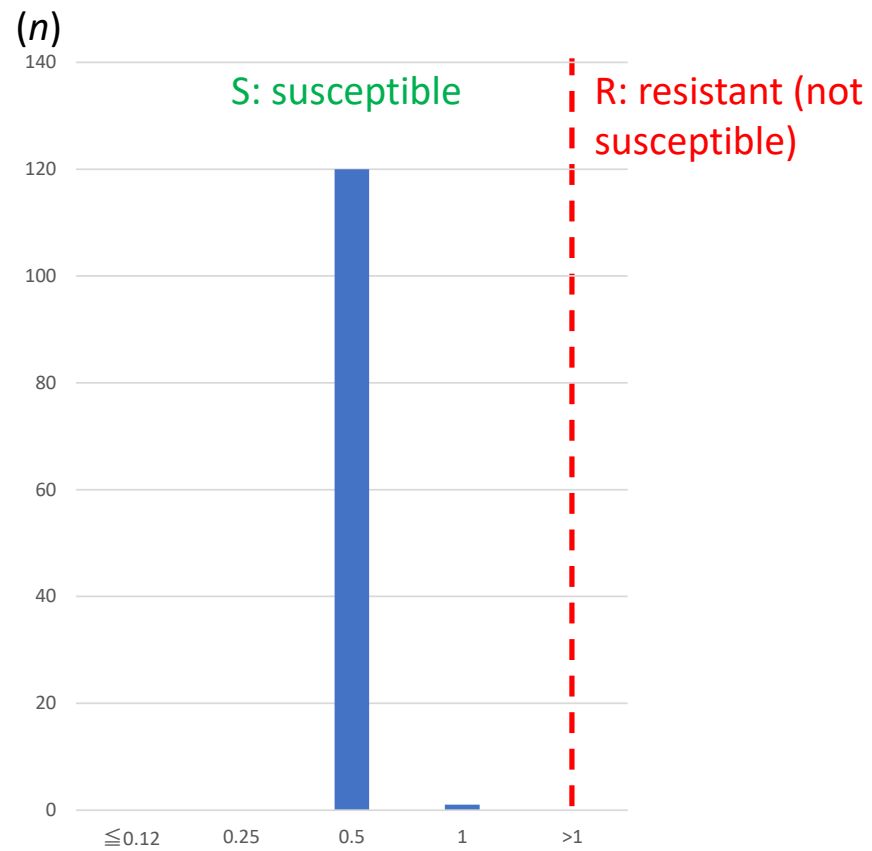

MIC, minimum inhibitory concentration MIC ( $\mu\text{g/mL}$ )

# Ceftriaxone MIC distribution

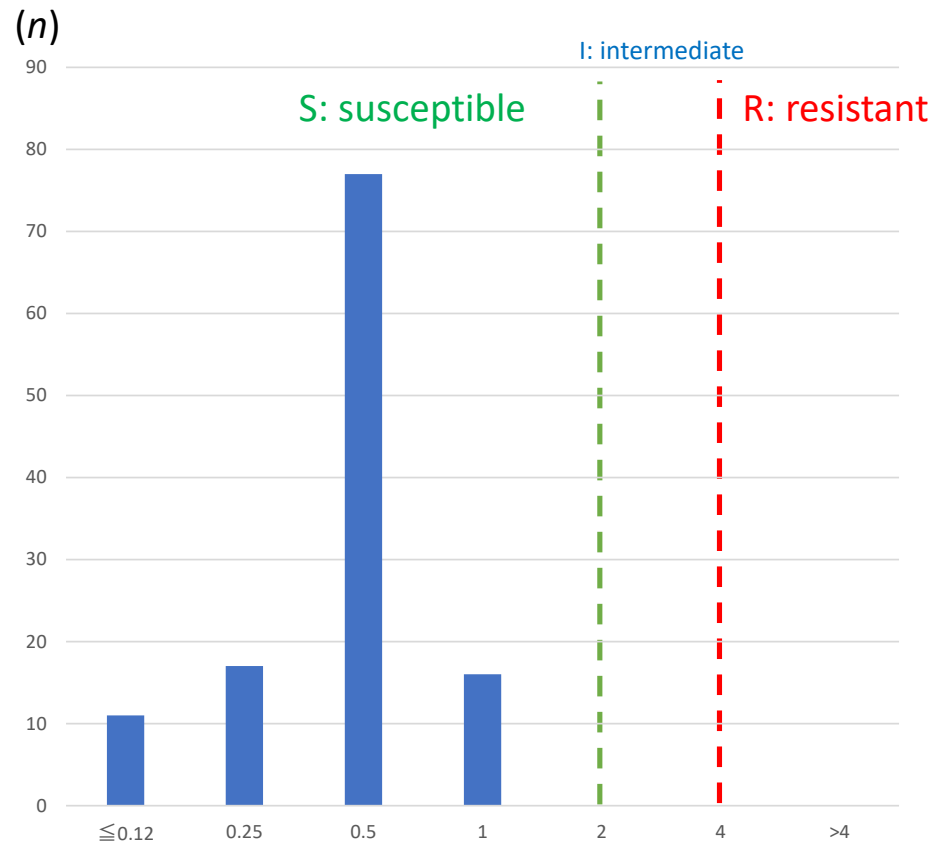

MIC, minimum inhibitory concentration MIC (µg/mL)

# Azithromycin MIC distribution

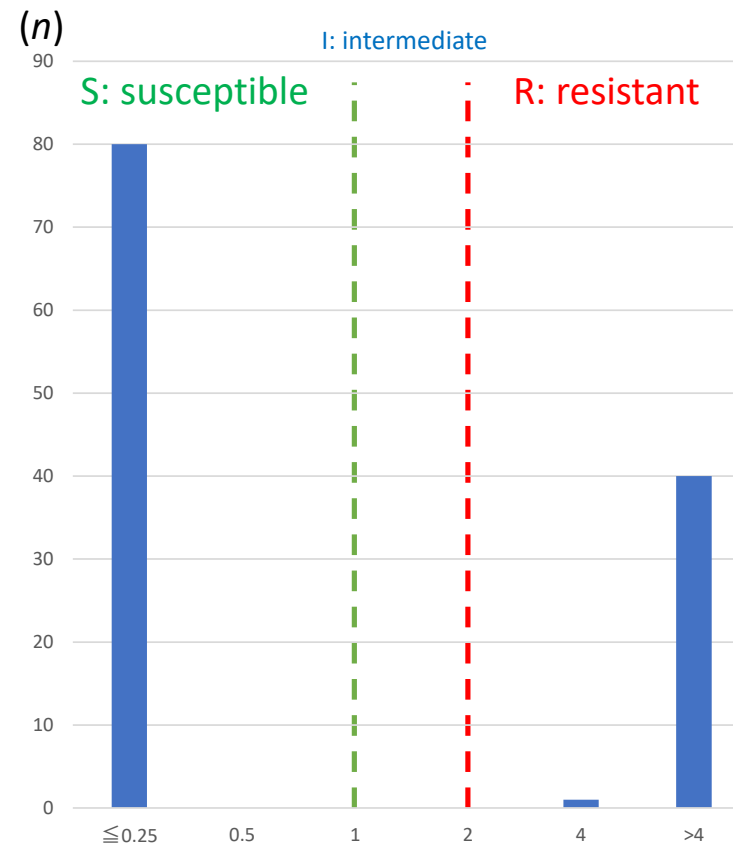

MIC, minimum inhibitory concentration MIC (µg/mL)

Supplementary Fig. 3

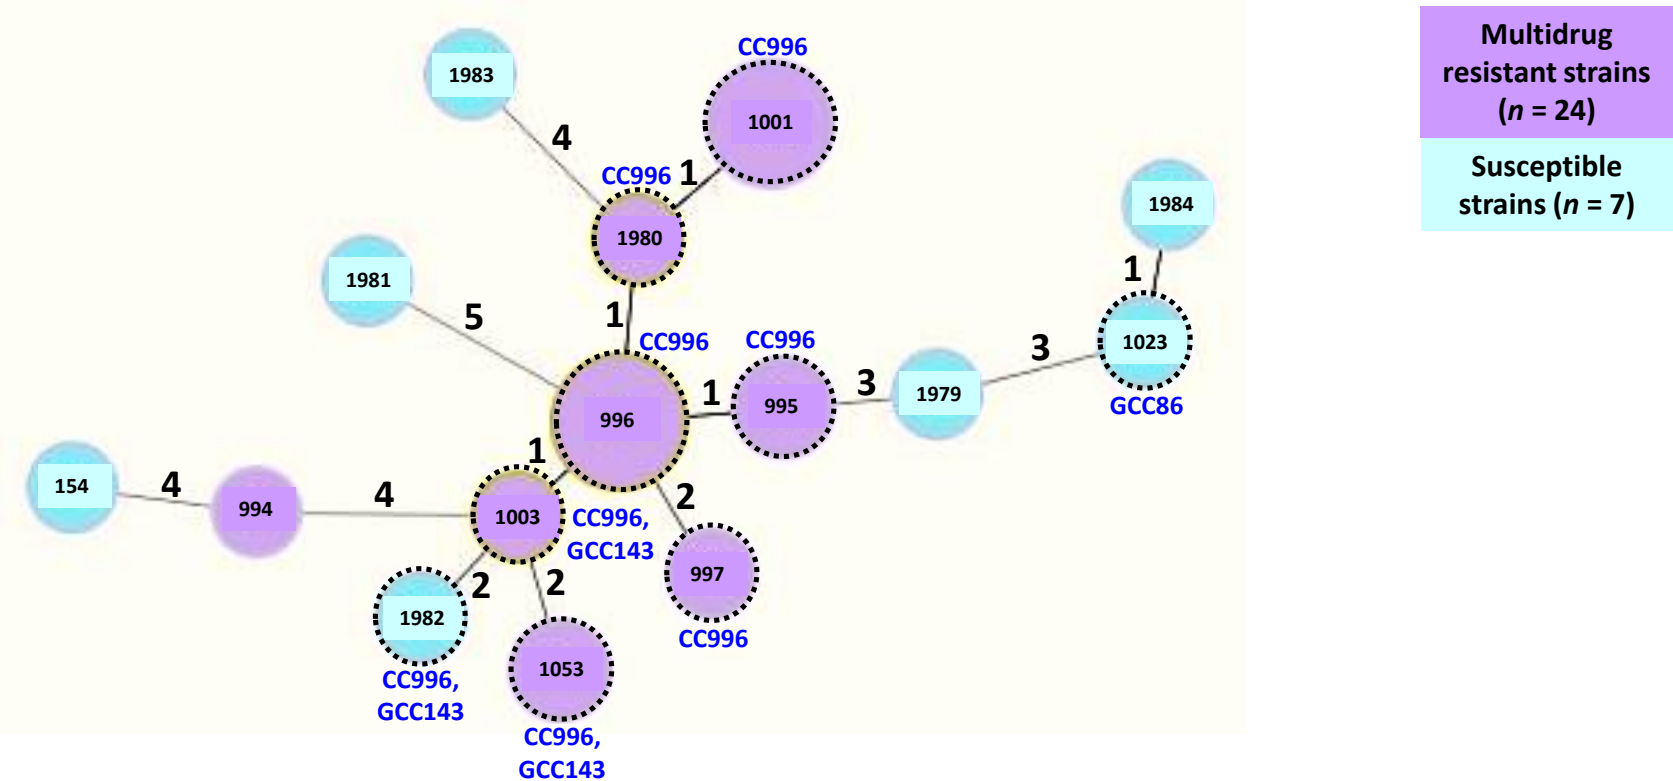

**Legend**

The goeBURST diagram of antimicrobial susceptibility patterns by *Streptococcus uberis* strains. The numbers in the circles show sequence types (STs), and the numbers near the lines indicate the numbers of differing alleles between two connected STs. Putative clonal complexes (CCs) are identified by an outer dotted frame and correspond to STs with the highest numbers containing single-locus/double-locus/triple-locus variants. Light violet and light blue in the circles represent multidrug resistant strains (n = 24) and susceptible strains (n = 7), respectively. GCCs, global clonal complexes.



| Supplementary Table 1. Fourteen antimicrobial minimum inhibitory concentrations (µg/mL) against each isolate with susceptibility results and antimicrobial resistance (AMR) genotype of each isolate |                              |              |            |             |              |                 |            |            |          |             |              |           |             |             |               |             |                |                |                |             |             |                |                |                |                |                |                |
|------------------------------------------------------------------------------------------------------------------------------------------------------------------------------------------------------|------------------------------|--------------|------------|-------------|--------------|-----------------|------------|------------|----------|-------------|--------------|-----------|-------------|-------------|---------------|-------------|----------------|----------------|----------------|-------------|-------------|----------------|----------------|----------------|----------------|----------------|----------------|
| Isolate (prefecture)                                                                                                                                                                                 | Collection date (year/month) | Penicillin G | Ampicillin | Minocycline | Erythromycin | Chloramphenicol | Cefotaxime | Cefazopran | Cefepime | Clindamycin | Levofloxacin | Meropenem | Vanco mycin | Ceftriaxone | Azithro mycin | <i>blaZ</i> | <i>erm</i> (A) | <i>erm</i> (B) | <i>mef</i> (A) | <i>linB</i> | <i>lnuD</i> | <i>tet</i> (M) | <i>tet</i> (O) | <i>tet</i> (K) | <i>tet</i> (L) | <i>tet</i> (S) |                |
| UB1 (Chiba)                                                                                                                                                                                          | 2022/Mar                     | 0.12         | 0.25       | >4          | >2           | ≤0.12           | 0.5        | 0.25       | <0.5     | >1          | 0.5          | 0.25      | 0.5         | 0.5         | >4            |             |                | <i>erm</i> (B) |                |             |             |                | <i>tet</i> (O) |                |                |                |                |
| UB2 (Chiba)                                                                                                                                                                                          | 2022/Mar                     | 0.12         | 0.12       | >4          | >2           | ≤0.12           | 0.5        | 0.25       | <0.5     | >1          | 1            | 0.25      | 0.5         | 0.25        | >4            |             |                | <i>erm</i> (B) |                |             |             |                | <i>tet</i> (O) |                |                |                |                |
| UB3 (Chiba)                                                                                                                                                                                          | 2022/Mar                     | 0.12         | 0.12       | ≤0.5        | ≤0.12        | ≤0.12           | 0.5        | 0.25       | <0.5     | ≤0.12       | 0.5          | ≤0.12     | 0.5         | 0.25        | ≤0.25         |             |                |                |                |             |             |                |                |                |                |                |                |
| UB4 (Chiba)                                                                                                                                                                                          | 2022/Mar                     | 0.12         | 0.12       | >4          | ≤0.12        | ≤0.12           | 0.5        | 0.25       | <0.5     | >1          | 0.5          | 0.25      | 0.5         | 0.25        | ≤0.25         |             |                |                |                |             | <i>lnuD</i> |                |                |                |                | <i>tet</i> (S) |                |
| UB5 (Chiba)                                                                                                                                                                                          | 2022/Apr                     | 0.12         | 0.12       | ≤0.5        | ≤0.12        | ≤0.12           | 1          | 0.5        | <0.5     | >1          | ≤0.25        | 0.5       | 0.5         | 0.5         | ≤0.25         |             |                |                |                | <i>linB</i> |             |                |                |                |                |                |                |
| UB6 (Chiba)                                                                                                                                                                                          | 2022/Apr                     | 0.12         | 0.12       | ≤0.5        | ≤0.12        | ≤0.12           | 1          | 0.5        | <0.5     | >1          | 0.5          | ≤0.12     | 0.5         | 1           | ≤0.25         |             |                |                |                | <i>linB</i> |             |                |                |                |                |                |                |
| UB7 (Chiba)                                                                                                                                                                                          | 2022/Apr                     | 0.12         | 0.12       | >4          | >2           | ≤0.12           | 0.5        | 0.25       | <0.5     | >1          | 0.5          | 0.25      | 0.5         | 0.25        | >4            |             |                | <i>erm</i> (B) |                |             |             |                | <i>tet</i> (O) |                |                |                |                |
| UB8 (Chiba)                                                                                                                                                                                          | 2022/Apr                     | 0.06         | 0.12       | >4          | ≤0.12        | ≤0.12           | 0.5        | 0.25       | <0.5     | >1          | 0.5          | 0.25      | 0.5         | 0.25        | ≤0.25         |             |                |                |                | <i>linB</i> | <i>lnuD</i> |                |                |                |                | <i>tet</i> (S) |                |
| UB9 (Chiba)                                                                                                                                                                                          | 2022/May                     | 0.06         | ≤0.06      | ≤0.5        | ≤0.12        | ≤0.12           | 0.25       | ≤0.12      | <0.5     | ≤0.12       | 0.5          | ≤0.12     | 0.5         | 0.25        | ≤0.25         |             |                |                |                |             |             |                |                |                |                |                |                |
| UB10 (Chiba)                                                                                                                                                                                         | 2022/May                     | 0.12         | 0.12       | ≤0.5        | ≤0.12        | ≤0.12           | 0.5        | 0.5        | <0.5     | ≤0.12       | ≤0.25        | ≤0.12     | 0.5         | 0.5         | ≤0.25         |             |                |                |                |             |             |                |                |                |                |                |                |
| UB11 (Chiba)                                                                                                                                                                                         | 2022/May                     | 0.06         | 0.12       | ≤0.5        | ≤0.12        | ≤0.12           | 0.5        | 0.5        | <0.5     | ≤0.12       | 0.5          | ≤0.12     | 0.5         | 0.5         | ≤0.25         |             |                |                |                |             |             |                |                |                |                |                |                |
| UB12 (Chiba)                                                                                                                                                                                         | 2022/May                     | 0.12         | 0.12       | ≤0.5        | ≤0.12        | ≤0.12           | 0.5        | 0.5        | <0.5     | ≤0.12       | 0.5          | 0.25      | 0.5         | 0.5         | ≤0.25         |             |                |                |                |             |             |                |                |                |                |                |                |
| UB13 (Chiba)                                                                                                                                                                                         | 2022/May                     | 0.12         | 0.12       | ≤0.5        | ≤0.12        | ≤0.12           | 0.5        | 0.5        | <0.5     | >1          | 0.5          | 0.25      | 0.5         | 0.5         | ≤0.25         |             |                |                |                |             | <i>lnuD</i> |                |                |                |                |                |                |
| UB14 (Chiba)                                                                                                                                                                                         | 2022/May                     | 0.12         | ≤0.06      | ≤0.5        | ≤0.12        | ≤0.12           | ≤0.12      | ≤0.12      | <0.5     | ≤0.12       | 1            | ≤0.12     | 0.5         | ≤0.12       | ≤0.25         |             |                |                |                |             |             |                |                |                |                |                |                |
| UB15 (Chiba)                                                                                                                                                                                         | 2022/May                     | 0.12         | 0.12       | >4          | >2           | ≤0.12           | 0.5        | 0.25       | <0.5     | >1          | 0.5          | 0.25      | 0.5         | 0.5         | >4            |             |                | <i>erm</i> (B) |                |             |             |                | <i>tet</i> (O) |                |                |                |                |
| UB16 (Chiba)                                                                                                                                                                                         | 2022/May                     | 0.12         | 0.25       | >4          | ≤0.12        | ≤0.12           | 0.5        | 0.25       | <0.5     | >1          | 0.5          | 0.25      | 0.5         | 0.5         | ≤0.25         |             |                |                |                | <i>linB</i> | <i>lnuD</i> |                |                |                |                | <i>tet</i> (S) |                |
| UB17 (Chiba)                                                                                                                                                                                         | 2022/May                     | 0.12         | 0.12       | ≤0.5        | ≤0.12        | ≤0.12           | 0.5        | 0.25       | <0.5     | ≤0.12       | 0.5          | ≤0.12     | 0.5         | 0.5         | ≤0.25         |             |                |                |                |             |             |                |                |                |                |                |                |
| UB18 (Chiba)                                                                                                                                                                                         | 2022/May                     | 0.12         | 0.12       | ≤0.5        | ≤0.12        | ≤0.12           | 0.25       | 0.25       | <0.5     | >1          | 0.5          | 0.5       | 0.5         | 0.5         | ≤0.25         |             |                |                |                |             | <i>lnuD</i> |                |                |                |                |                |                |
| UB19 (Chiba)                                                                                                                                                                                         | 2022/May                     | 0.12         | 0.12       | ≤0.5        | ≤0.12        | ≤0.12           | 0.5        | 0.25       | <0.5     | ≤0.12       | 0.5          | ≤0.12     | 0.5         | 0.5         | ≤0.25         |             |                |                |                |             |             |                |                |                |                |                |                |
| UB20 (Chiba)                                                                                                                                                                                         | 2022/May                     | 0.12         | 0.12       | ≤0.5        | ≤0.12        | ≤0.12           | 0.25       | 0.25       | <0.5     | >1          | 0.5          | ≤0.12     | 0.5         | 0.25        | ≤0.25         |             |                |                |                | <i>linB</i> | <i>lnuD</i> |                |                |                |                |                |                |
| UB21 (Chiba)                                                                                                                                                                                         | 2022/May                     | 0.06         | 0.12       | ≤0.5        | ≤0.12        | ≤0.12           | 0.5        | 0.25       | <0.5     | ≤0.12       | 0.5          | ≤0.12     | 0.5         | 0.25        | ≤0.25         |             |                |                |                |             | <i>lnuD</i> |                |                |                |                |                |                |
| UB22 (Chiba)                                                                                                                                                                                         | 2022/May                     | ≤0.03        | ≤0.06      | ≤0.5        | ≤0.12        | ≤0.12           | ≤0.12      | ≤0.12      | <0.5     | ≤0.12       | 0.5          | ≤0.12     | 0.5         | ≤0.12       | ≤0.25         |             |                |                |                |             |             |                |                |                |                |                |                |
| UB23 (Chiba)                                                                                                                                                                                         | 2022/May                     | ≤0.03        | ≤0.06      | >4          | >2           | ≤0.12           | ≤0.12      | ≤0.12      | <0.5     | >1          | 0.5          | ≤0.12     | 0.5         | ≤0.12       | >4            |             |                | <i>erm</i> (B) |                |             |             |                | <i>tet</i> (O) |                |                |                |                |
| UB24 (Chiba)                                                                                                                                                                                         | 2022/May                     | ≤0.03        | ≤0.06      | ≤0.5        | ≤0.12        | ≤0.12           | ≤0.12      | ≤0.12      | <0.5     | ≤0.12       | 0.5          | ≤0.12     | 0.5         | ≤0.12       | ≤0.25         |             |                |                |                |             |             |                |                |                |                |                |                |
| UB25 (Chiba)                                                                                                                                                                                         | 2022/Jun                     | 0.12         | 0.12       | >4          | >2           | ≤0.12           | 0.5        | 0.5        | <0.5     | >1          | 0.5          | 0.25      | 0.5         | 0.5         | >4            |             |                | <i>erm</i> (B) |                |             |             |                | <i>tet</i> (O) |                |                |                |                |
| UB26 (Chiba)                                                                                                                                                                                         | 2022/Jun                     | 0.12         | 0.25       | ≤0.5        | ≤0.12        | ≤0.12           | 0.5        | 0.5        | <0.5     | >1          | 0.5          | 0.25      | 0.5         | 0.5         | ≤0.25         |             |                |                |                |             | <i>lnuD</i> |                |                |                |                |                |                |
| UB28 (Chiba)                                                                                                                                                                                         | 2022/Jun                     | 0.25         | 0.25       | >4          | >2           | ≤0.12           | 0.5        | 0.5        | <0.5     | >1          | 0.5          | 0.25      | 0.5         | 0.5         | >4            | <i>blaZ</i> |                | <i>erm</i> (B) |                |             |             |                | <i>tet</i> (O) |                |                |                |                |
| UB29 (Chiba)                                                                                                                                                                                         | 2022/Jun                     | ≤0.03        | ≤0.06      | ≤0.5        | ≤0.12        | ≤0.12           | ≤0.12      | ≤0.12      | <0.5     | ≤0.12       | 0.5          | ≤0.12     | 0.5         | ≤0.12       | ≤0.25         |             |                |                |                |             |             |                |                |                |                |                |                |
| UB30 (Chiba)                                                                                                                                                                                         | 2022/Jun                     | 0.12         | 0.12       | ≤0.5        | ≤0.12        | ≤0.12           | 1          | 0.5        | <0.5     | ≤0.12       | 0.5          | ≤0.12     | 1           | 0.5         | ≤0.25         |             |                |                |                |             |             |                |                |                |                |                |                |
| UB31 (Chiba)                                                                                                                                                                                         | 2022/Jun                     | 0.12         | 0.25       | ≤0.5        | ≤0.12        | ≤0.12           | 0.5        | 0.25       | <0.5     | ≤0.12       | 0.5          | 0.25      | 0.5         | 0.5         | ≤0.25         |             |                |                |                |             |             |                |                |                |                |                |                |
| UB32 (Chiba)                                                                                                                                                                                         | 2022/Jun                     | 0.12         | 0.25       | >4          | ≤0.12        | ≤0.12           | 0.5        | 0.25       | <0.5     | ≤0.12       | 0.5          | 0.25      | 0.5         | 0.5         | ≤0.25         |             |                |                |                |             | <i>lnuD</i> |                |                |                |                | <i>tet</i> (S) |                |
| UB33 (Chiba)                                                                                                                                                                                         | 2022/Jun                     | 0.12         | 0.25       | >4          | ≤0.12        | ≤0.12           | 0.5        | 0.25       | <0.5     | ≤0.12       | 0.5          | 0.25      | 0.5         | 0.5         | ≤0.25         |             |                |                |                |             | <i>lnuD</i> |                |                |                |                | <i>tet</i> (S) |                |
| UB34 (Chiba)                                                                                                                                                                                         | 2022/Jun                     | 0.12         | 0.25       | ≤0.5        | ≤0.12        | ≤0.12           | 0.5        | 0.25       | <0.5     | ≤0.12       | 0.5          | 0.25      | 0.5         | 0.5         | ≤0.25         |             |                |                |                |             |             |                |                |                |                |                |                |
| UB35 (Chiba)                                                                                                                                                                                         | 2022/Jun                     | 0.12         | 0.12       | ≤0.5        | ≤0.12        | ≤0.12           | 0.5        | 0.25       | <0.5     | ≤0.12       | 0.5          | ≤0.12     | 0.5         | 0.5         | ≤0.25         |             |                |                |                |             |             |                |                |                |                |                |                |
| UB36 (Chiba)                                                                                                                                                                                         | 2022/Jun                     | 0.12         | 0.25       | >4          | >2           | ≤0.12           | 0.5        | 0.5        | <0.5     | >1          | 0.5          | 0.25      | 0.5         | 0.5         | >4            |             |                | <i>erm</i> (B) |                |             |             |                | <i>tet</i> (O) |                |                |                |                |
| UB37 (Chiba)                                                                                                                                                                                         | 2022/Jun                     | 0.25         | 0.25       | >4          | >2           | ≤0.12           | 0.5        | 0.5        | <0.5     | >1          | 0.5          | 0.25      | 0.5         | 0.5         | >4            |             |                | <i>erm</i> (B) |                |             |             |                | <i>tet</i> (O) |                |                |                |                |
| UB38 (Chiba)                                                                                                                                                                                         | 2022/Jun                     | 0.12         | 0.25       | >4          | >2           | ≤0.12           | 0.5        | 0.25       | <0.5     | >1          | 0.5          | 0.25      | 0.5         | 0.5         | >4            |             |                | <i>erm</i> (B) |                |             |             |                | <i>tet</i> (O) |                |                |                |                |
| UB40 (Chiba)                                                                                                                                                                                         | 2022/Jun                     | ≤0.03        | ≤0.06      | ≤0.5        | ≤0.12        | ≤0.12           | ≤0.12      | ≤0.12      | <0.5     | ≤0.12       | 0.5          | ≤0.12     | 0.5         | ≤0.12       | ≤0.25         |             |                |                |                |             |             |                |                | <i>tet</i> (O) |                |                |                |
| UB41 (Chiba)                                                                                                                                                                                         | 2022/Jun                     | 0.12         | 0.25       | >4          | >2           | ≤0.12           | 0.5        | 0.5        | <0.5     | >1          | 0.5          | 0.25      | 0.5         | 0.5         | >4            |             |                | <i>erm</i> (B) |                |             |             |                | <i>tet</i> (O) |                |                |                |                |
| UB42 (Chiba)                                                                                                                                                                                         | 2022/Jul                     | 0.12         | 0.12       | >4          | ≤0.12        | ≤0.12           | 0.5        | 0.25       | <0.5     | >1          | 0.5          | 0.25      | 0.5         | 0.5         | ≤0.25         |             |                |                |                | <i>linB</i> | <i>lnuD</i> |                |                |                |                | <i>tet</i> (S) |                |
| UB44 (Chiba)                                                                                                                                                                                         | 2022/Jul                     | ≤0.03        | ≤0.06      | ≤0.5        | ≤0.12        | ≤0.12           | ≤0.12      | ≤0.12      | <0.5     | ≤0.12       | 0.5          | ≤0.12     | 0.5         | ≤0.12       | ≤0.25         |             |                |                |                |             |             |                |                |                |                |                |                |
| UB45 (Chiba)                                                                                                                                                                                         | 2022/Jul                     | ≤0.03        | ≤0.06      | ≤0.5        | ≤0.12        | ≤0.12           | 0.25       | ≤0.12      | <0.5     | ≤0.12       | 0.5          | ≤0.12     | 0.5         | ≤0.12       | ≤0.25         |             |                |                |                |             | <i>lnuD</i> |                |                |                |                |                |                |
| UB46 (Chiba)                                                                                                                                                                                         | 2022/Jul                     | 0.12         | 0.25       | ≤0.5        | ≤0.12        | ≤0.12           | 0.5        | 0.25       | <0.5     | >1          | 0.5          | 0.25      | 0.5         | 0.5         | ≤0.25         |             |                |                |                |             | <i>lnuD</i> |                |                |                |                |                |                |
| UB47 (Chiba)                                                                                                                                                                                         | 2022/Jul                     | 0.12         | 0.25       | ≤0.5        | ≤0.12        | ≤0.12           | 0.5        | 0.5        | <0.5     | >1          | 0.5          | 0.25      | 0.5         | 0.5         | ≤0.25         | <i>blaZ</i> |                |                |                |             | <i>lnuD</i> |                |                |                |                |                |                |
| UB48 (Chiba)                                                                                                                                                                                         | 2022/Jul                     | 0.12         | 0.12       | >4          | ≤0.12        | ≤0.12           | 0.25       | 0.25       | <0.5     | >1          | 0.5          | ≤0.12     | 0.5         | 0.5         | ≤0.25         |             |                |                |                |             |             |                |                |                |                |                | <i>tet</i> (S) |
| UB49 (Chiba)                                                                                                                                                                                         | 2022/Jul                     | 0.06         | 0.12       | ≤0.5        | ≤0.12        | ≤0.12           | 0.25       | ≤0.12      | <0.5     | >1          | 0.5          | ≤0.12     | 0.5         | 0.25        | ≤0.25         |             |                |                |                | <i>linB</i> |             |                |                |                |                |                |                |
| UB50 (Chiba)                                                                                                                                                                                         | 2022/Jul                     | 0.12         | 0.12       | >4          | >2           | ≤0.12           | 0.5        | 0.5        | <0.5     | >1          | 0.5          | 0.25      | 0.5         | 0.5         | >4            |             |                | <i>erm</i> (B) |                |             |             |                | <i>tet</i> (O) |                |                |                |                |
| UB51 (Chiba)                                                                                                                                                                                         | 2022/Jul                     | 0.06         | 0.12       | 1           | ≤0.12        | ≤0.12           | 0.25       | ≤0.12      | <0.5     | ≤0.12       | 0.5          | ≤0.12     | 0.5         | 0.25        | ≤0.25         |             |                |                |                |             |             |                |                |                |                | <i>tet</i> (S) |                |
| UB52 (Chiba)                                                                                                                                                                                         | 2022/Jul                     | 0.12         | 0.12       | >4          | >2           | ≤0.12           | 0.5        | 0.5        | <0.5     | >1          | 0.5          | 0.25      | 0.5         | 0.5         | >4            |             |                | <i>erm</i> (B) |                |             |             |                | <i>tet</i> (O) |                |                |                |                |



|                 |          |      |      |      |       |    |      |       |      |       |       |       |     |       |       |  |         |         |      |         |         |  |         |
|-----------------|----------|------|------|------|-------|----|------|-------|------|-------|-------|-------|-----|-------|-------|--|---------|---------|------|---------|---------|--|---------|
| HK1 (Hokkaido)  | 2023/Aug | 0.25 | 0.25 | >4   | >2    | ≤4 | 1    | 0.5   | ≤0.5 | >1    | 0.5   | 0.25  | 0.5 | 1     | >4    |  | erm (B) |         |      |         | tet (O) |  |         |
| HK2 (Hokkaido)  | 2023/Aug | 0.06 | 0.25 | ≤0.5 | ≤0.12 | ≤4 | 1    | 0.5   | ≤0.5 | ≤0.12 | 0.5   | 0.25  | 0.5 | 1     | ≤0.25 |  |         |         |      |         |         |  |         |
| HK3 (Hokkaido)  | 2023/Aug | 0.12 | 0.25 | ≤0.5 | ≤0.12 | ≤4 | 1    | 0.5   | ≤0.5 | ≤0.12 | 0.5   | 0.25  | 0.5 | 1     | ≤0.25 |  |         |         |      |         |         |  |         |
| HK4 (Hokkaido)  | 2023/Aug | 0.12 | 0.12 | ≤0.5 | ≤0.12 | ≤4 | 1    | 0.5   | ≤0.5 | ≤0.12 | 0.5   | 0.25  | 0.5 | 0.5   | ≤0.25 |  |         |         |      |         |         |  |         |
| HK5 (Hokkaido)  | 2023/Aug | 0.12 | 0.25 | ≤0.5 | ≤0.12 | ≤4 | 0.5  | 0.25  | ≤0.5 | ≤0.12 | 1     | ≤0.12 | 0.5 | 0.5   | ≤0.25 |  |         |         |      |         |         |  |         |
| HK6 (Hokkaido)  | 2023/Aug | 0.12 | 0.25 | >4   | >2    | ≤4 | 1    | 0.25  | ≤0.5 | >1    | 0.5   | 0.25  | 0.5 | 1     | >4    |  | erm (B) |         |      |         | tet (O) |  |         |
| HK7 (Hokkaido)  | 2023/Aug | 0.06 | 0.12 | >4   | >2    | ≤4 | 0.25 | ≤0.12 | ≤0.5 | >1    | ≤0.25 | ≤0.12 | 0.5 | ≤0.12 | >4    |  | erm (B) |         |      | tet (M) | tet (O) |  |         |
| HK8 (Hokkaido)  | 2023/Aug | 0.12 | 0.25 | ≤0.5 | >2    | ≤4 | 0.5  | 0.5   | ≤0.5 | ≤0.12 | 0.5   | 0.25  | 0.5 | 1     | 4     |  |         | mef (A) |      |         |         |  |         |
| HK9 (Hokkaido)  | 2023/Aug | 0.12 | 0.12 | ≤0.5 | ≤0.12 | ≤4 | 0.5  | 0.5   | ≤0.5 | ≤0.12 | ≤0.25 | 0.25  | 0.5 | 0.25  | ≤0.25 |  |         |         |      | lnuD    |         |  |         |
| HK10 (Hokkaido) | 2023/Aug | 0.25 | 0.25 | ≤0.5 | ≤0.12 | ≤4 | 1    | 1     | ≤0.5 | >1    | 0.5   | 0.5   | 0.5 | 1     | ≤0.25 |  |         |         | linB |         |         |  |         |
| HK11 (Hokkaido) | 2023/Aug | 0.06 | 0.12 | ≤0.5 | ≤0.12 | ≤4 | 0.25 | 0.25  | ≤0.5 | ≤0.12 | ≤0.25 | ≤0.12 | 0.5 | 0.25  | ≤0.25 |  |         |         |      |         |         |  |         |
| HK12 (Hokkaido) | 2023/Aug | 0.12 | 0.25 | ≤0.5 | ≤0.12 | ≤4 | 0.5  | 0.25  | ≤0.5 | ≤0.12 | 0.5   | 0.25  | 0.5 | 0.5   | ≤0.25 |  |         |         |      |         |         |  |         |
| HK13 (Hokkaido) | 2023/Aug | 0.12 | 0.25 | ≤0.5 | ≤0.12 | ≤4 | 0.5  | 0.25  | ≤0.5 | ≤0.12 | 0.5   | 0.25  | 0.5 | 0.5   | ≤0.25 |  |         |         |      |         |         |  |         |
| HK14 (Hokkaido) | 2023/Aug | 0.12 | 0.12 | >4   | >2    | ≤4 | 1    | 0.5   | ≤0.5 | >1    | 0.5   | ≤0.12 | 0.5 | 1     | >4    |  | erm (B) |         |      |         | tet (O) |  |         |
| HK15 (Hokkaido) | 2023/Aug | 0.12 | 0.12 | 1    | ≤0.12 | ≤4 | 0.25 | 0.25  | ≤0.5 | >1    | 0.5   | 0.25  | 0.5 | 0.5   | ≤0.25 |  |         |         | linB |         |         |  |         |
| HK16 (Hokkaido) | 2023/Aug | 0.12 | 0.25 | >4   | >2    | ≤4 | 0.5  | 0.5   | ≤0.5 | >1    | 0.5   | 0.25  | 0.5 | 0.5   | >4    |  | erm (B) |         |      |         | tet (O) |  |         |
| HK17 (Hokkaido) | 2023/Sep | 0.25 | 0.25 | >4   | ≤0.12 | ≤4 | 0.5  | 0.5   | ≤0.5 | >1    | 1     | 0.25  | 0.5 | 1     | ≤0.25 |  |         |         | linB |         |         |  | tet (S) |
| HK18 (Okinawa)  | 2023/Sep | 0.12 | 0.25 | >4   | ≤0.12 | ≤4 | 0.25 | 0.25  | ≤0.5 | >1    | 0.5   | 0.25  | 0.5 | 0.5   | ≤0.25 |  |         |         | linB | lnuD    |         |  | tet (S) |
| HK19 (Okinawa)  | 2023/Sep | 0.12 | 0.25 | ≤0.5 | ≤0.12 | ≤4 | 0.5  | 0.25  | ≤0.5 | ≤0.12 | 1     | ≤0.12 | 0.5 | 0.5   | ≤0.25 |  |         |         |      |         |         |  |         |
| HK20 (Hokkaido) | 2023/Sep | 0.12 | 0.25 | >4   | >2    | ≤4 | 0.25 | 0.25  | ≤0.5 | >1    | 0.5   | 0.25  | 0.5 | 0.5   | >4    |  | erm (B) |         |      |         | tet (O) |  |         |

Yellow shading indicates AMR phenotype and genotype. Green shading indicates intermediate susceptibility.

| Supplementary Table 2. Oligonucleotide primer set for amplifying antimicrobial resistance gene, their melting temperature (T <sub>m</sub> ) value, and amplicon size by polymerase chain reaction (PCR) |               |           |                             |              |                             |                           |           |
|---------------------------------------------------------------------------------------------------------------------------------------------------------------------------------------------------------|---------------|-----------|-----------------------------|--------------|-----------------------------|---------------------------|-----------|
| Target gene (function or encoding protein)                                                                                                                                                              | Primer set    | Direction | Sequence (5'→3')            | Length (mer) | Expected amplicon size (bp) | T <sub>m</sub> value (°C) | Reference |
| 16S rRNA                                                                                                                                                                                                | 27F           | forward   | AGAGTTTGATCMTGGCTCAG        | 20           | 1459                        | 52                        | [4, 17]   |
| (internal control)                                                                                                                                                                                      | 1485R         | reverse   | TACGGTTACCTGTTACGAC         | 20           |                             | 49                        |           |
| <i>bla</i> Z                                                                                                                                                                                            | stau-blaZ-fwd | forward   | CAAAGATGATATAGTTGCTTATTCTCC | 27           | 421                         | 54                        | [16]      |
| (penicillinase)                                                                                                                                                                                         | stau-blaZ-rev | reverse   | TGCTTGACCACTTTTATCAGC       | 21           |                             | 52                        |           |
| <i>erm</i> (A)                                                                                                                                                                                          | ermA-F        | forward   | CCCGAAAAATACGCAAAATTCAT     | 24           | 590                         | 53                        | [5, 11]   |
| (inducible-type methylase)                                                                                                                                                                              | ermA-R        | reverse   | CCCTGTTTACCACTTTATAAACG     | 23           |                             | 51                        |           |
| <i>erm</i> (B)                                                                                                                                                                                          | ermB-F        | forward   | TGGTATCCAAAATGCGTAATG       | 21           | 745                         | 50                        | [5, 11]   |
| (constitutive-type methylase)                                                                                                                                                                           | ermB-R        | reverse   | CTGTGGTATGGCGGTAAGT         | 20           |                             | 53                        |           |
| <i>mef</i> (A)                                                                                                                                                                                          | mefA-F        | forward   | CAATATGGGCAGGGCAAG          | 18           | 317                         | 51                        | [5, 11]   |
| (transmembrane domains of an ABC transporter)                                                                                                                                                           | mefA-R        | reverse   | AAGCTGTCCAATGCTACGG         | 20           |                             | 54                        |           |
| <i>linB</i>                                                                                                                                                                                             | linB-F        | forward   | CCTACCTATTGTTTGTTGGAA       | 20           | 945                         | 47                        | [5]       |
| (lincosamide nucleotidyltransferase)                                                                                                                                                                    | linB-R        | reverse   | ATAACGTTACTCTCCTATTC        | 20           |                             | 45                        |           |
| <i>InuD</i>                                                                                                                                                                                             | InuD-F        | forward   | ACGGAGGGATCACATGGTAA        | 20           | 475                         | 52                        | [5]       |
| (lincosamide nucleotidyltransferase)                                                                                                                                                                    | InuD-R        | reverse   | TCTCTCGCATAATAACCTTACGTC    | 24           |                             | 55                        |           |
| <i>tet</i> (M)                                                                                                                                                                                          | tetM-F        | forward   | GTGGACAAAGGTACAACGAG        | 20           | 406                         | 51                        | [5, 11]   |
| (ribosomal protection protein)                                                                                                                                                                          | tetM-R        | reverse   | CGGTAAGTTCGTACACAC          | 20           |                             | 51                        |           |
| <i>tet</i> (O)                                                                                                                                                                                          | tetO-F        | forward   | AACTTAGGCATTCTGGCTCAC       | 21           | 515                         | 54                        | [5, 11]   |
| (ribosomal protection protein)                                                                                                                                                                          | tetO-R        | reverse   | TCCCACTGTCCATATCGTCA        | 21           |                             | 53                        |           |
| <i>tet</i> (K)                                                                                                                                                                                          | tetK-F        | forward   | GATCAATTGTAGCTTTAGGTGAAGG   | 25           | 155                         | 55                        | [5, 11]   |
| (efflux pump)                                                                                                                                                                                           | tetK-R        | reverse   | TTTTGTTGATTACCAGGTACCATT    | 25           |                             | 52                        |           |
| <i>tet</i> (L)                                                                                                                                                                                          | tetL-F        | forward   | TGGTGGAATGATAGCCCAT         | 20           | 229                         | 51                        | [5, 11]   |
| (efflux pump)                                                                                                                                                                                           | tetL-R        | reverse   | CAGGAATGACAGCACGCTAA        | 20           |                             | 54                        |           |
| <i>tet</i> (S)                                                                                                                                                                                          | tetS-F        | forward   | TCCGATAGTGATCCCCTTCT        | 20           | 445                         | 52                        | [5, 11]   |
| (ribosomal protection protein)                                                                                                                                                                          | tetS-R        | reverse   | GGAAATCTGCTGGCGTACTG        | 20           |                             | 54                        |           |
| T <sub>m</sub> value was calculated using nearest neighbor method.                                                                                                                                      |               |           |                             |              |                             |                           |           |
| PCR was done with an initial denaturation at 93°C/3 min, followed by 30 cycles (denaturation at 93°C/1 min, annealing at 62°C/1 min, and extension at 65°C/4 min), and a final extension at 65°C/3 min. |               |           |                             |              |                             |                           |           |
